# Supplementary material for: Ion-exchange synthesis of Ag/Ag2S/Ag3CuS2ternary hollow microspheres with efficient visible-light photocatalytic activity
Source: Royal Society of Chemistry journal article supplement (doi:10.1039/c3dt52875h), 2013-11-22
Supplement: c3dt52875h.pdf [file c3dt52875h.pdf]

## Supporting Information

### **Ion-exchange Synthesis of Ag/Ag<sub>2</sub>S/Ag<sub>3</sub>CuS<sub>2</sub> Ternary Hollow Microspheres with Efficient Visible-light Photocatalytic Activity**

*Chaosheng Xing, Yuan Zhang, Zhudong Wu, Deli Jiang and Min Chen\**

School of Chemistry and Chemical Engineering, Jiangsu University, Zhenjiang

212013, P. R. China

\* Corresponding author:

Tel.: +86 51188791708; Fax: +86 511 88791800

E-mail address: chenmin3226@sina.com (M Chen), dlj@ujs.edu.cn (DL Jiang)

Contents:

**Figure. S1** (a) SEM image, (b) TEM image, (c) particle size distribution histogram of the  $\text{Cu}_2\text{O}$  spheres; (d) SEM image, (e) TEM image, (f) particle size distribution histogram of the  $\text{Cu}_7\text{S}_4$  hollow spheres.

**Figure. S2** The photographs of sample-containing solution: (a)  $\text{Cu}_2\text{O}$ , (b)  $\text{Cu}_7\text{S}_4$  (c)  $\text{Ag}/\text{Ag}_2\text{S}/\text{Ag}_3\text{CuS}_2$ .

**Figure. S3** Color change of the MO solution over  $\text{Ag}/\text{Ag}_2\text{S}/\text{Ag}_3\text{CuS}_2$  sample.

**Figure. S1**

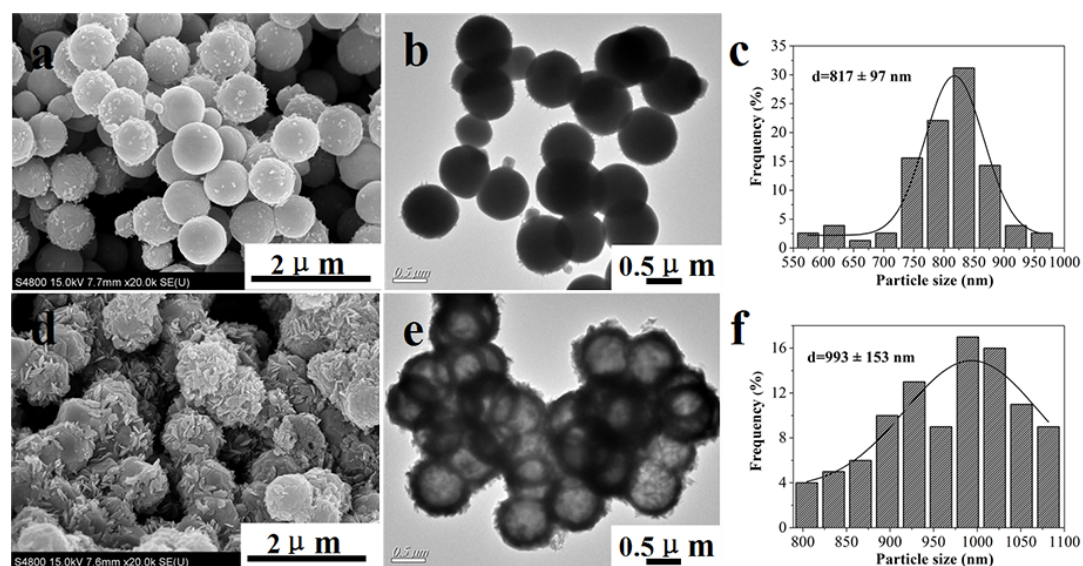

Figure. S1 (a) SEM image, (b) TEM image, (c) particle size distribution histogram of the  $\text{Cu}_2\text{O}$  spheres; (d) SEM image, (e) TEM image, (f) particle size distribution histogram of the  $\text{Cu}_7\text{S}_4$  hollow spheres.

**Figure. S2**

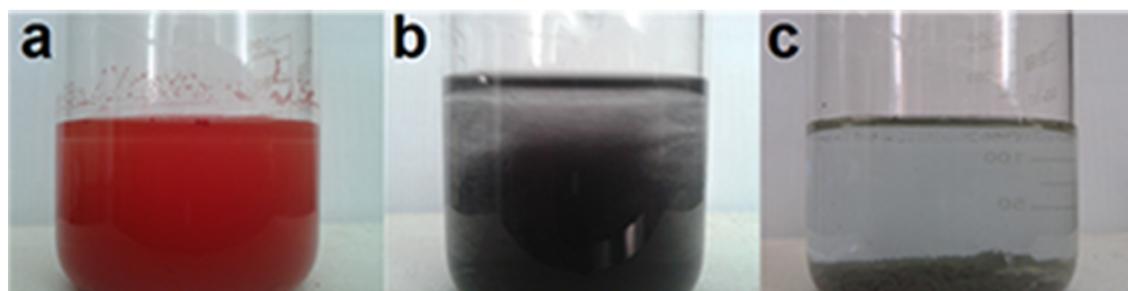

Figure. S2 The photographs of sample-containing solution: (a)  $\text{Cu}_2\text{O}$ , (b)  $\text{Cu}_7\text{S}_4$  (c)  $\text{Ag}/\text{Ag}_2\text{S}/\text{Ag}_3\text{CuS}_2$ .

**Figure. S3**

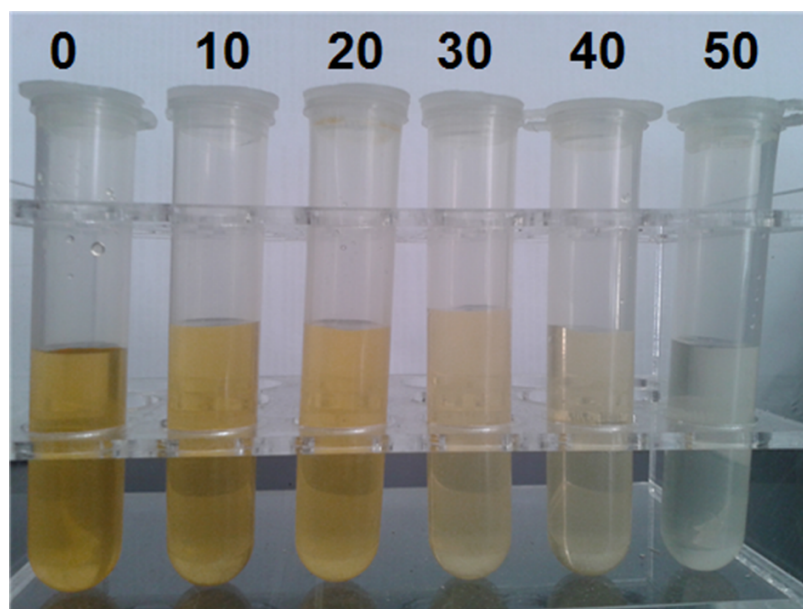

Figure. S3 Color change of the MO solution over  $\text{Ag}/\text{Ag}_2\text{S}/\text{Ag}_3\text{CuS}_2$  sample.
